# Supplementary material for: Crosstalk between CCL7 and CCR3 promotes metastasis of colon cancer cells via ERK-JNK signaling pathways
Source: PubMed Central journal article supplement (PMC5095043; doi:10.18632/oncotarget.9209), 2016-05-06
Supplement: oncotarget-07-36842-s001.pdf [file oncotarget-07-36842-s001.pdf]

## SUPPLEMENTARY MATERIALS AND METHODS

### Cell culture and reagents

HT29 colorectal cancer cells were cultured with RPMI 1640 (Gibco, Grand Island, NY, USA) supplemented

with 10% FBS (Gibco) and 1% penicillin-streptomycin (Gibco) in a 5% CO<sub>2</sub> incubator at 37°C. Human recombinant CCL7 protein and anti-CCL7 antibody was obtained from R&D systems (R&D, Minneapolis, MN, USA).

## SUPPLEMENTARY FIGURES

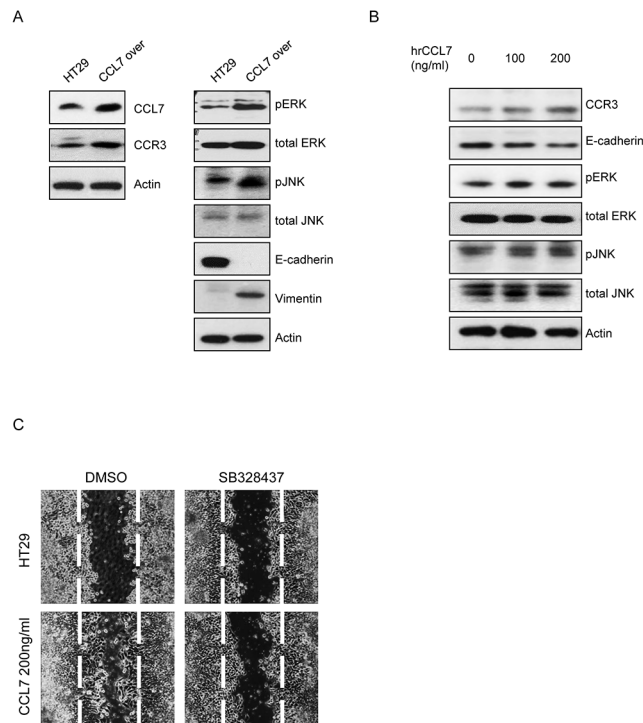

**Supplementary Figure S1: CCL7 increases EMT through CCR3 in HT29 colon cancer cells.** **A.** Expression of CCL7, CCR3 (left panel), ERK, JNK, E-cadherin, and vimentin (right panel) in HT29 cells stably transfected with GFP or CCL7 were measured by western blotting. **B.** Western blot analysis of CCR3, E-cadherin, ERK, and JNK expression in response to human recombinant CCL7 (hrCCL7) treatment for 24h. **C.** A wound healing assay was performed by creating a wound on a confluent monolayer HT29 cells. Cells were pretreated with 20 nM CCR3 inhibitor SB 328437 for 1 hour followed by incubation with hrCCL7 for 48 hours.

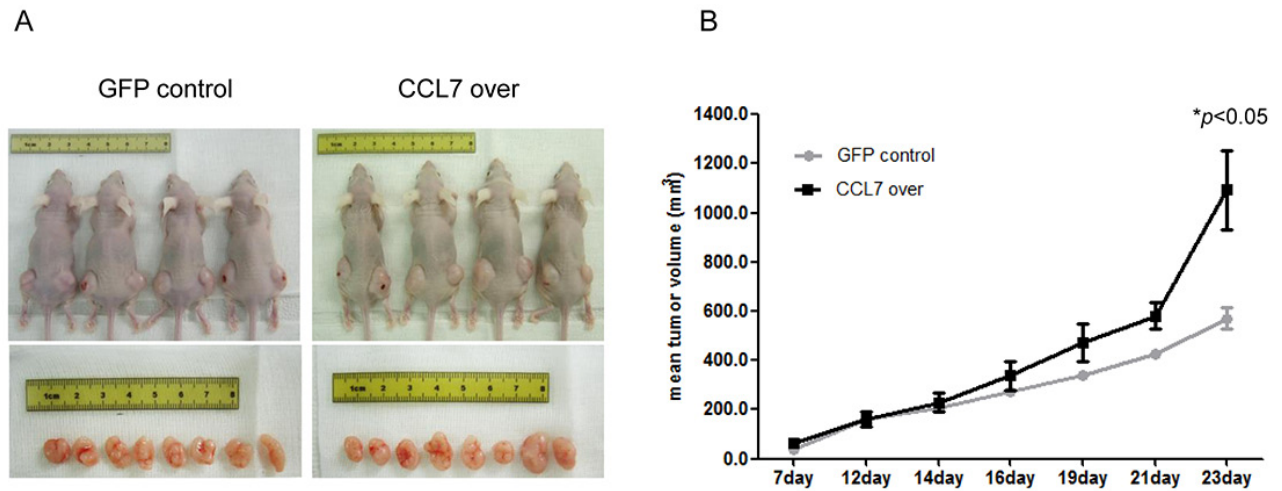

**Supplementary Figure S2: CCL7 overexpression provokes tumorigenesis in HT29 cells.** A. Tumor images and B. Tumor volumes at 3 weeks after transplantation of HT29 cells overexpressing GFP (control) or CCL7 into nude mice ( $n = 4$ ). Tumor size was measured at least twice a week with a caliper. Tumor volume was calculated using the following formula: (short length  $\times$  long length  $\times$  width)/2.
